# Supplementary material for: Architectural control of urea in supramolecular 1D strontium vanadium oxide chains
Source: Royal Society of Chemistry journal article supplement (doi:10.1039/c4dt03691c), 2015-01-01

**Supporting Information (SI)**  
**For**  
**Architectural control of urea in supramolecular 1D strontium vanadium  
oxide chains**

**1. Instrumentation**

**Elemental analysis:** Euro Vector Euro EA 3000 elemental analyzer.

**Single-crystal X-Ray Diffraction (XRD):** Nonius Kappa CCD single-crystal X-ray diffractometer ( $\lambda(\text{Mo-K}\alpha) = 0.71073 \text{ \AA}$ ) equipped with a graphite monochromator.

**UV-Vis spectroscopy:** UV-Vis spectra from 200 to 1000 nm were collected on a Shimadzu UV-2401 PC UV-Vis spectrophotometer in transmission mode using quartz cuvettes with 1.0 cm optical path length. UV-Vis spectra from 200 to 1600 nm were collected on a Shimadzu UV-3600 UV-Vis-NIR spectrophotometer in transmission mode using quartz cuvettes with 1.0 cm optical path length.

**Fourier-transform infrared (FT-IR) spectroscopy:** Unless stated otherwise, the materials were prepared as KBr pellets. FT-IR spectra were collected in transmission mode using a Shimadzu FT-IR-8400S spectrometer. FT-IR spectroscopy of compound **2** was performed on a Shimadzu FT-IRPrestige-21 spectrometer including a Golden Gate ATR-unit. Signals are given in wavenumbers ( $\text{cm}^{-1}$ ), intensities are denoted as vs = very strong, s = strong, m = medium, w = weak, b = broad.

**Mass spectrometry:** Electrospray-ionization mass spectrometry (ESI-MS) was performed using *ultra-high resolution* time-of-flight (UHR-TOF) Bruker Daltonik maXis mass spectrometer in negative ion detection mode. Measurement conditions: source voltage: 4 kV, sample flow rate: 500  $\mu\text{l/h}$ , drying gas temperature ( $\text{N}_2$ ): 180 °C. Before each series of measurements the spectrometer was calibrated with Agilent "ESI-TOF low concentration tuning mixture".

**General remarks:** All chemicals were purchased from Sigma Aldrich, ABCR or ACROS and were of reagent grade. The chemicals were used without further purification unless stated otherwise.

## 2. Synthetic section

### 2.1. Synthesis of 1:

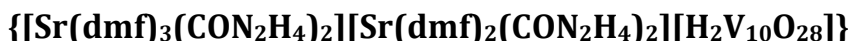

(<sup>n</sup>Bu<sub>4</sub>N)<sub>3</sub>[H<sub>3</sub>V<sub>10</sub>O<sub>28</sub>] (0.20 g, 0.12 mmol), SrBr<sub>2</sub> · 6 H<sub>2</sub>O (0.09 g, 0.25 mmol) and CON<sub>2</sub>H<sub>4</sub> (0.06 g, 1.07 mmol) were suspended in *N,N*-dimethyl formamide (DMF, 6 ml) and the reaction mixture was heated to 70 °C for 2 h. Thereby the color changed from orange to reddish orange and slight turbidity occurred. After the addition of H<sub>2</sub>O (250 µl) the solution turned clear. Diffusion crystallization with acetone as diffusion solvent resulted in yellow crystalline plates. The crude product was washed with acetone and was air-dried.

**Yield:** 10.2 mg (5.87 µmol, 4.89 % based on V)

**Elemental analysis in wt.-% for Sr<sub>2</sub>V<sub>10</sub>O<sub>37</sub>C<sub>19</sub>N<sub>13</sub>H<sub>53</sub> (calcd.):** C 12.83 (13.11), N 10.26 (10.46), H 2.96 (3.07).

**Characteristic IR-bands (in cm<sup>-1</sup>):** 3325 (m, b), 3210 (m, b), 2933 (w), 1646 (vs), 1624 (vs), 1566 (s), 1495 (s), 1432 (s), 1250 (m), 981 (s), 940 (vs), 826 (vs).

### 2.2. Synthesis of 2: {[Sr(dmf)<sub>4</sub>]<sub>2</sub>[H<sub>2</sub>V<sub>10</sub>O<sub>28</sub>]}

(<sup>n</sup>Bu<sub>4</sub>N)<sub>3</sub>[H<sub>3</sub>V<sub>10</sub>O<sub>28</sub>] (0.409 g, 0.24 mmol) and SrBr<sub>2</sub> · 6 H<sub>2</sub>O (0.173 g, 0.49 mmol) were dissolved in DMF (5 ml). After the addition of H<sub>2</sub>O (400 µl) the orange solution was heated to 70 °C for 2 h. Diffusion crystallization with acetone as diffusion solvent yielded single orange crystalline blocks. The crude product was washed with acetone and was air-dried.

**Yield:** 155.1 mg (0.09 mmol, 75 % based on V)

**Elemental analysis in wt.-% for Sr<sub>2</sub>V<sub>10</sub>O<sub>36</sub>C<sub>24</sub>N<sub>8</sub>H<sub>58</sub> (calcd.):** C 16.83 (16.77), N 6.08 (6.52), H 3.42 (3.40).

**Characteristic IR-bands (in cm<sup>-1</sup>):** 2934 (w), 2353 (m), 1663 (vs), 1385 (m), 1109 (m), 972 (vs), 837 (s), 755 (m).

### 3. UV-Vis spectroscopy

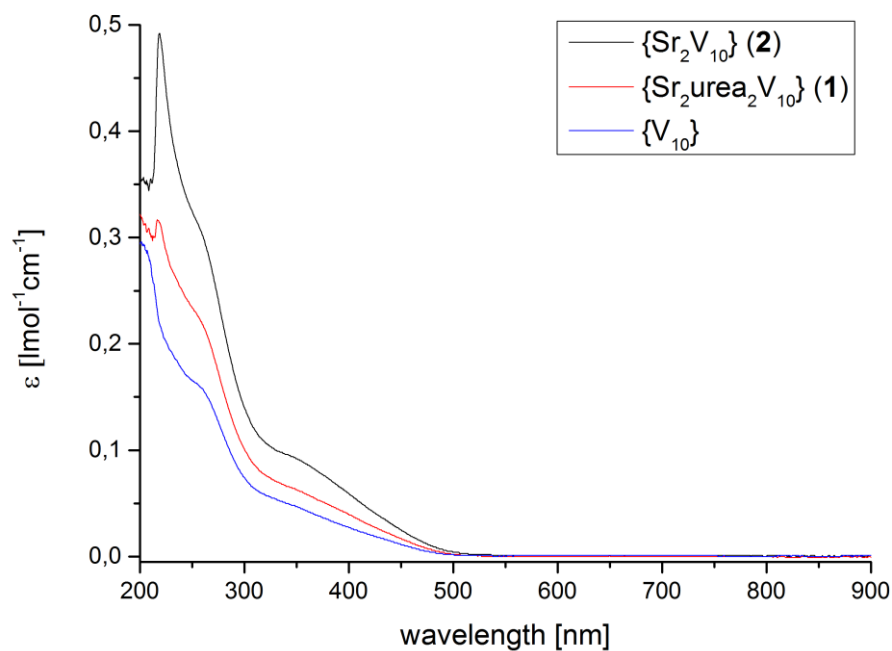

**Figure 1:** Room temperature UV-Vis spectra of  $\{V_{10}\}$ , **1**, **2** recorded in methanolic solution ( $c = 2.5 \times 10^{-4}$  M).

### 4. Mass spectrometry

#### 4.1. $\{[Sr(dm f)_3(CON_2H_4)_2][Sr(dm f)_2(CON_2H_4)_2][V_{10}O_{28}]\}$ (**1**)

| Found m/z | Simulated m/z | Charge | Assignment                     |
|-----------|---------------|--------|--------------------------------|
| 280.7903  | 280.7918      | 2-     | $[V_6O_{16}]^{2-}$             |
| 413.1878  | 413.1899      | 2-     | $[V_8^V V_2^{IV} O_{23}]^{2-}$ |
| 454.6567  | 454.6568      | 2-     | $[V_8^V V_2^{IV} O_{25}]^{2-}$ |
| 462.6532  | 462.6543      | 2-     | $[V_{10}O_{26}]^{2-}$          |
| 480.6623  | 480.6648      | 2-     | $[H_4V_{10}O_{28}]^{2-}$       |

**Table 1:** Cluster units and fragments of compound **1** assigned by analysis of negative-mode ESI-MS spectra.

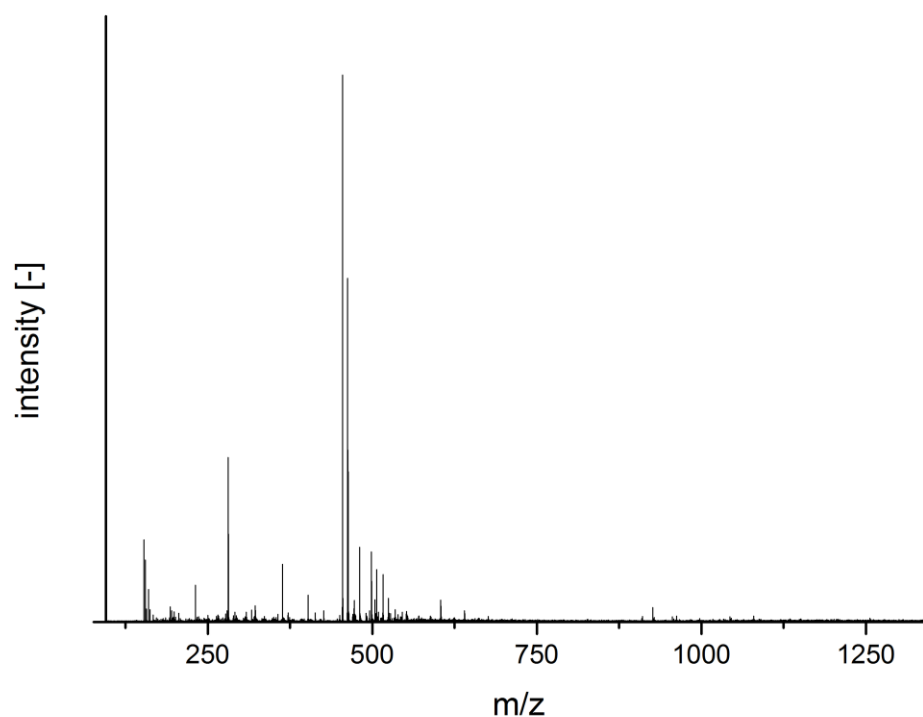

**Figure 2:** Negative-mode high resolution ESI mass spectrum of **1** in DMF ( $c = 5 \times 10^{-5}$  M).

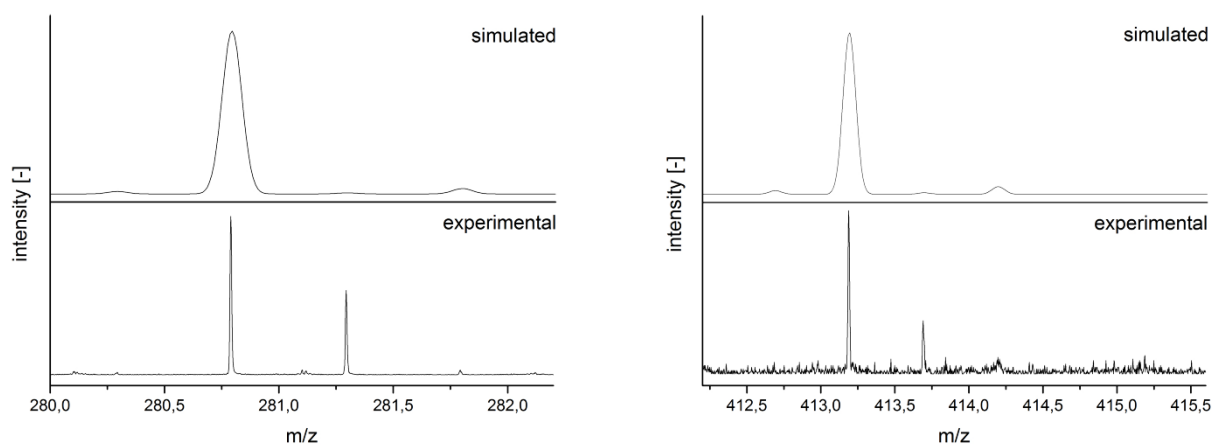

**Figure 3: Left:** Experimental and simulated ESI mass spectrum of  $[\text{V}_6\text{O}_{16}]^{2-}$  observed at  $m/z = 280.7903$ . **Right:** Experimental and simulated ESI mass spectrum of  $[\text{V}_8^{\text{V}}\text{V}^{\text{IV}}\text{O}_{23}]^{2-}$  observed at  $m/z = 413.1878$ .

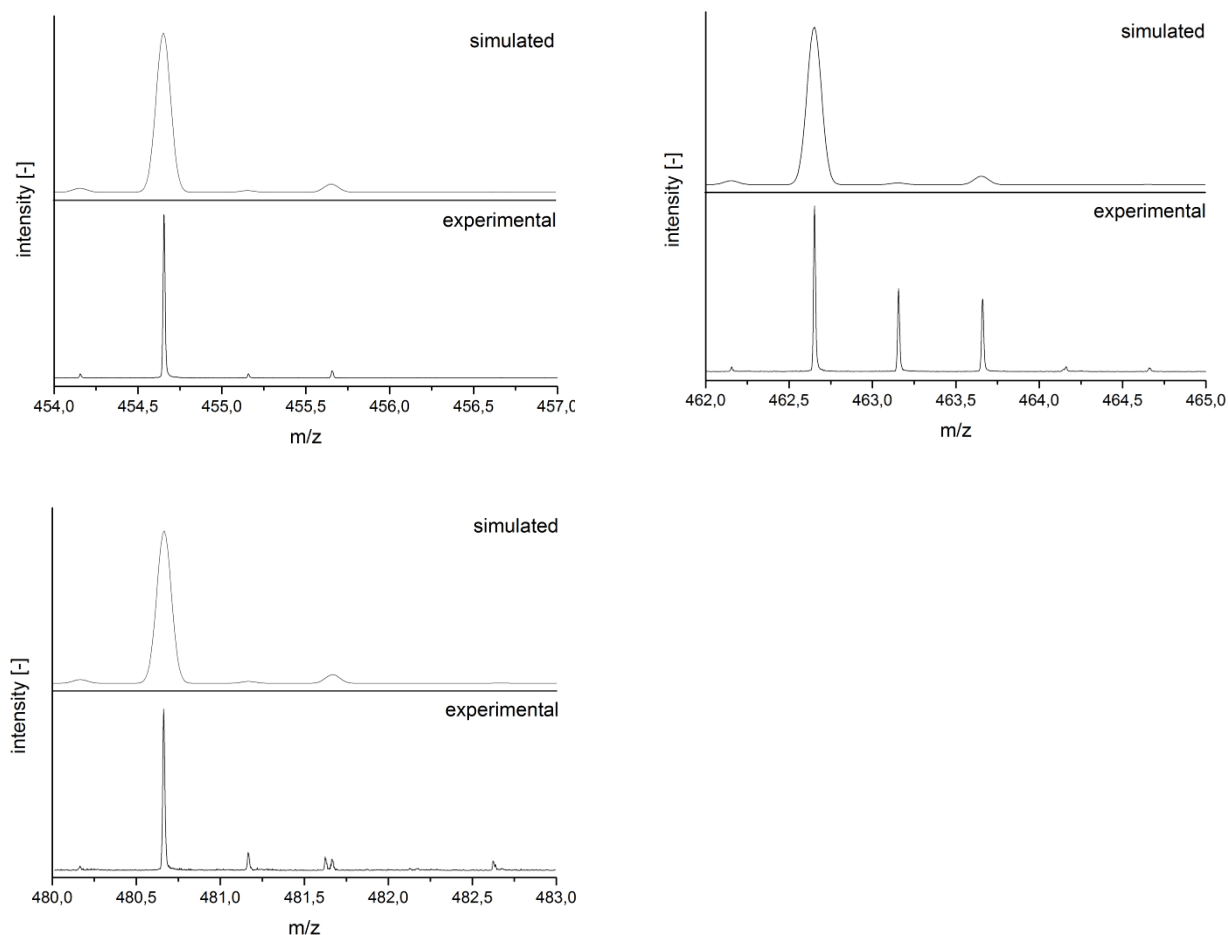

**Figure 4:** **Top Left:** Experimental and simulated ESI mass spectrum of  $[V_8V^{IV}_2O_{25}]^{2-}$  observed at  $m/z = 454.6567$ . **Top Right:** Experimental and simulated ESI mass spectrum of  $[V_{10}O_{26}]^{2-}$  observed at  $m/z = 462.6532$ . **Bottom Left:** Experimental and simulated ESI mass spectrum of the principal building block  $[H_4V_{10}O_{28}]^{2-}$  observed at  $m/z = 480.6623$ .

## 4.2. $\{[Sr(dmf)_4]_2[V_{10}O_{28}]\} (2)$

| Found m/z | Simulated m/z | Charge | Assignment                                     |
|-----------|---------------|--------|------------------------------------------------|
| 280.7917  | 280.7918      | 2-     | $[V_6O_{16}]^{2-}$                             |
| 330.7603  | 330.7600      | 2-     | $\{H[V_7O_{19}]\}^{2-}$                        |
| 371.7229  | 371.7230      | 2-     | $[V_8O_{21}]^{2-}$                             |
| 380.7277  | 380.7283      | 1-     | $\{H[V_4O_{11}]\}^-$                           |
| 423.6718  | 423.6733      | 2-     | $[SrV_8O_{22}]^{2-}$                           |
| 462.6529  | 462.6543      | 2-     | $[V_{10}O_{26}]^{2-}$                          |
| 480.6630  | 480.6648      | 2-     | $\{H_4[V_{10}O_{28}]\}^{2-}$                   |
| 514.6045  | 514.6046      | 2-     | $[SrV_{10}O_{27}]^{2-}$                        |
| 519.1053  | 519.1072      | 4-     | $\{H_2[SrV_{10}O_{28}][SrV_{10}O_{27}]\}^{4-}$ |
| 531.9197  | 531.9213      | 3-     | $\{[SrV_{10}O_{28}][SrV_5O_{13}]\}^{3-}$       |
| 540.5796  | 540.5798      | 4-     | $\{[Sr_2V_{10}O_{28}][SrV_{10}O_{27}]\}^{4-}$  |
| 686.4734  | 686.4752      | 3-     | $\{H[SrV_{10}O_{28}][SrV_{10}O_{26}]\}^{3-}$   |

|          |          |    |                                                                    |
|----------|----------|----|--------------------------------------------------------------------|
| 692.4791 | 692.4787 | 3- | $\{H_3[SrV_{10}O_{28}][SrV_{10}O_{27}]\}^{3-}$                     |
| 721.1093 | 721.1088 | 3- | $\{H[Sr_2V_{10}O_{28}][SrV_{10}O_{27}]\}^{3-}$                     |
| 748.4152 | 748.4174 | 2- | $\{[SrV_{10}O_{28}][SrV_4O_{10}]\}^{2-}$                           |
| 793.8828 | 793.8831 | 4- | $\{[SrV_{10}O_{26}][Sr_2V_{10}O_{28}][SrV_{10}O_{27}]\}^{4-}$      |
| 798.3834 | 798.3858 | 4- | $\{H_2[SrV_{10}O_{27}][Sr_2V_{10}O_{28}][SrV_{10}O_{27}]\}^{4-}$   |
| 802.8888 | 802.8884 | 4- | $\{H_4[SrV_{10}O_{28}][Sr_2V_{10}O_{28}][SrV_{10}O_{27}]\}^{4-}$   |
| 807.3891 | 807.3910 | 4- | $\{H_6[V_{10}O_{28}][Sr_2V_{10}O_{28}][Sr_2V_{10}O_{28}]\}^{4-}$   |
| 819.8577 | 819.8583 | 4- | $\{[SrV_{10}O_{26}][Sr_2V_{10}O_{28}][Sr_2V_{10}O_{28}]\}^{4-}$    |
| 824.3614 | 824.3609 | 4- | $\{H_2[SrV_{10}O_{27}][Sr_2V_{10}O_{28}][Sr_2V_{10}O_{28}]\}^{4-}$ |
| 876.9840 | 876.9840 | 3- | $\{H[SrV_4O_{11}][Sr_2V_{10}O_{28}][SrV_{10}O_{27}]\}^{3-}$        |

**Table 2:** Cluster fragments and poly-cluster assemblies of compound **2** assigned by analysis of negative-mode ESI-MS spectra.

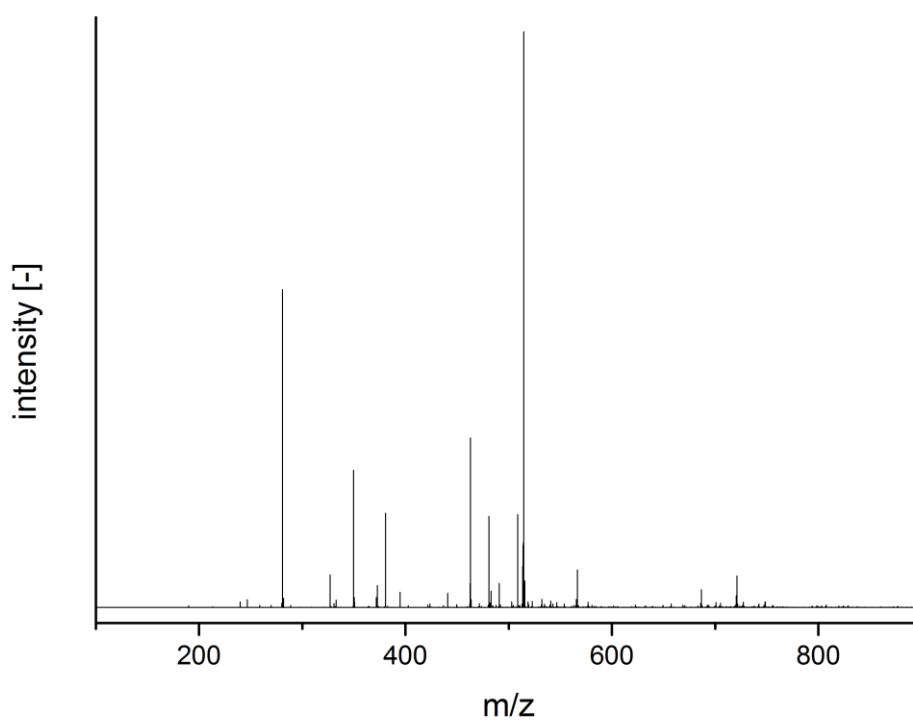

**Figure 5:** Negative-mode high resolution ESI mass spectrum of **2** in methanol ( $c = 5 \times 10^{-5}$  M).

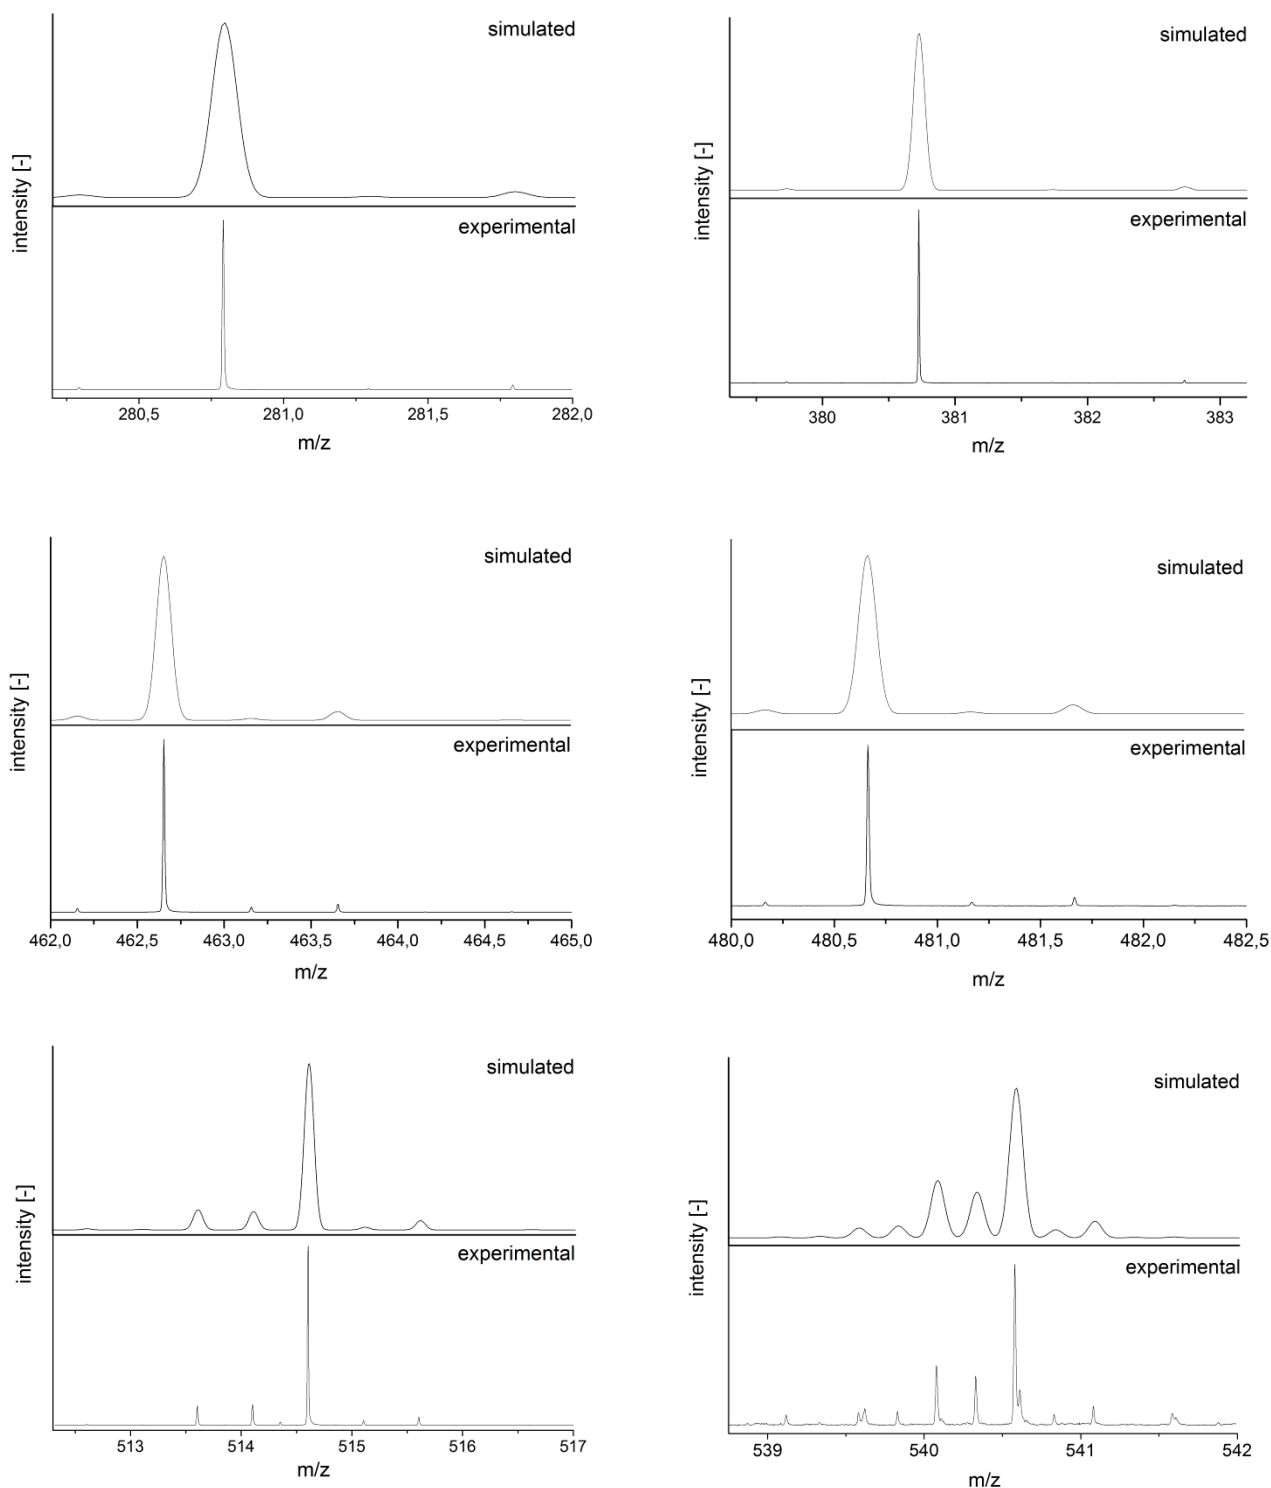

**Figure 6: Top Left:** Experimental and simulated ESI mass spectrum of  $[V_6O_{16}]^{2-}$  observed at  $m/z = 280.7917$ . **Top Right:** Experimental and simulated ESI mass spectrum of  $\{H[V_4O_{11}]\}^-$  observed at  $m/z = 380.7277$ . **Middle Left:** Experimental and simulated ESI mass spectrum of  $[V_{10}O_{26}]^{2-}$  observed at  $m/z = 462.6529$ . **Middle Right:** Experimental and simulated ESI mass spectrum of  $\{H_4[V_{10}O_{28}]\}^{2-}$  observed at  $m/z = 480.6630$ . **Bottom Left:** Experimental and simulated ESI mass spectrum of  $[SrV_{10}O_{27}]^{2-}$  observed at  $m/z = 514.6045$ . **Bottom Right:** Experimental and simulated ESI mass spectrum of  $\{[Sr_2V_{10}O_{28}][SrV_{10}O_{27}]\}^{4-}$  observed at  $m/z = 540.5796$ .

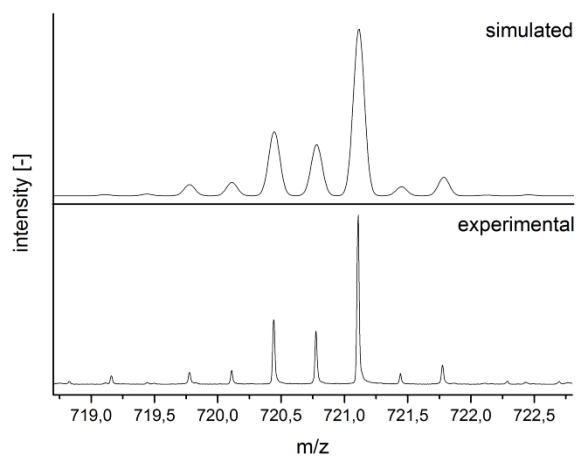

**Figure 7:** Experimental and simulated ESI mass spectrum of  $\{H[Sr_2V_{10}O_{28}][SrV_{10}O_{27}]\}^{3-}$  observed at  $m/z = 721.1093$ .

## 5. Crystallographic Section

### 5.1. {[Sr(dmf)<sub>3</sub>(CON<sub>2</sub>H<sub>4</sub>)<sub>2</sub>][Sr(dmf)<sub>2</sub>(CON<sub>2</sub>H<sub>4</sub>)<sub>2</sub>][H<sub>2</sub>V<sub>10</sub>O<sub>28</sub>]} (1)

|                                             |                                                                                                 |
|---------------------------------------------|-------------------------------------------------------------------------------------------------|
| CCDC code                                   | 1027675                                                                                         |
| Empirical formula                           | C <sub>19</sub> H <sub>53</sub> N <sub>13</sub> O <sub>37</sub> Sr <sub>2</sub> V <sub>10</sub> |
| Formula weight                              | 1740.36                                                                                         |
| Temperature/K                               | 150.15                                                                                          |
| Crystal system                              | monoclinic                                                                                      |
| Space group                                 | Cc                                                                                              |
| a/Å                                         | 10.8044(5)                                                                                      |
| b/Å                                         | 23.2995(14)                                                                                     |
| c/Å                                         | 22.2340(11)                                                                                     |
| α/°                                         | 90                                                                                              |
| β/°                                         | 100.681(4)                                                                                      |
| γ/°                                         | 90                                                                                              |
| Volume/Å <sup>3</sup>                       | 5500.1(5)                                                                                       |
| Z                                           | 4                                                                                               |
| ρ <sub>calc</sub> /g/cm <sup>3</sup>        | 2.099                                                                                           |
| μ/mm <sup>-1</sup>                          | 3.644                                                                                           |
| F(000)                                      | 3432.0                                                                                          |
| Crystal size/mm <sup>3</sup>                | 0.25 × 0.2 × 0.15                                                                               |
| Radiation                                   | MoKα (λ = 0.71073)                                                                              |
| 2θ range for data collection/°              | 12.47 to 53.002                                                                                 |
| Index ranges                                | -13 ≤ h ≤ 13, -29 ≤ k ≤ 29, -27 ≤ l ≤ 27                                                        |
| Reflections collected                       | 38057                                                                                           |
| Independent reflections                     | 10852 [R <sub>int</sub> = 0.0227, R <sub>sigma</sub> = 0.0259]                                  |
| Data/restraints/parameters                  | 10852/652/741                                                                                   |
| Goodness-of-fit on F <sup>2</sup>           | 1.054                                                                                           |
| Final R indexes [I ≥ 2σ (I)]                | R <sub>1</sub> = 0.0198, wR <sub>2</sub> = 0.0458                                               |
| Final R indexes [all data]                  | R <sub>1</sub> = 0.0229, wR <sub>2</sub> = 0.0467                                               |
| Largest diff. peak/hole / e Å <sup>-3</sup> | 0.69/-0.38                                                                                      |
| Flack parameter                             | -0.0033(16)                                                                                     |

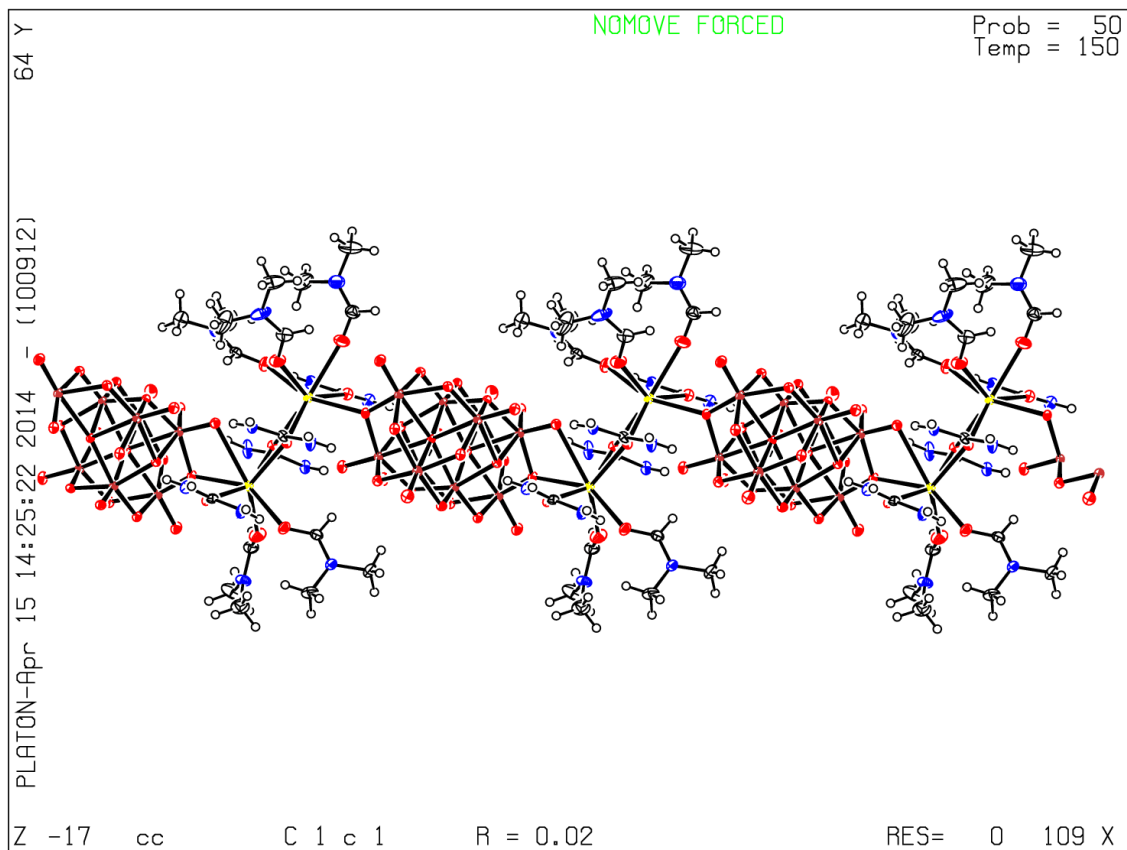

## 5.2. {[Sr(dmf)<sub>4</sub>]<sub>2</sub>[H<sub>2</sub>V<sub>10</sub>O<sub>28</sub>]} (2)

|                                             |                                                                                                |
|---------------------------------------------|------------------------------------------------------------------------------------------------|
| CCDC code                                   | 1027674                                                                                        |
| Empirical formula                           | C <sub>24</sub> H <sub>58</sub> N <sub>8</sub> O <sub>36</sub> Sr <sub>2</sub> V <sub>10</sub> |
| Formula weight                              | 17191.4                                                                                        |
| Temperature/K                               | 150                                                                                            |
| Crystal system                              | triclinic                                                                                      |
| Space group                                 | P-1                                                                                            |
| a/Å                                         | 10.9593(3)                                                                                     |
| b/Å                                         | 11.6409(7)                                                                                     |
| c/Å                                         | 12.2782(7)                                                                                     |
| α/°                                         | 104.697(4)                                                                                     |
| β/°                                         | 99.497(4)                                                                                      |
| γ/°                                         | 109.603(3)                                                                                     |
| Volume/Å <sup>3</sup>                       | 1372.51(13)                                                                                    |
| Z                                           | 2                                                                                              |
| ρ <sub>calc</sub> /g/cm <sup>3</sup>        | 2.078                                                                                          |
| μ/mm <sup>-1</sup>                          | 3.646                                                                                          |
| Crystal size/mm <sup>3</sup>                | 0.25 × 0.2 × 0.15                                                                              |
| Radiation                                   | MoKα (λ = 0.71073)                                                                             |
| 2θ range for data collection/°              | 12.438 to 53                                                                                   |
| Index ranges                                | -13 ≤ h ≤ 13, -14 ≤ k ≤ 14, -15 ≤ l ≤ 15                                                       |
| Reflections collected                       | 34533                                                                                          |
| Independent reflections                     | 5609 [R <sub>int</sub> = 0.0232, R <sub>sigma</sub> = 0.0150]                                  |
| Data/restraints/parameters                  | 5609/562/398                                                                                   |
| Goodness-of-fit on F <sup>2</sup>           | 1.047                                                                                          |
| Final R indexes [I ≥ 2σ (I)]                | R <sub>1</sub> = 0.0280, wR <sub>2</sub> = 0.0699                                              |
| Final R indexes [all data]                  | R <sub>1</sub> = 0.0342, wR <sub>2</sub> = 0.0747                                              |
| Largest diff. peak/hole / e Å <sup>-3</sup> | 1.31/-1.07                                                                                     |

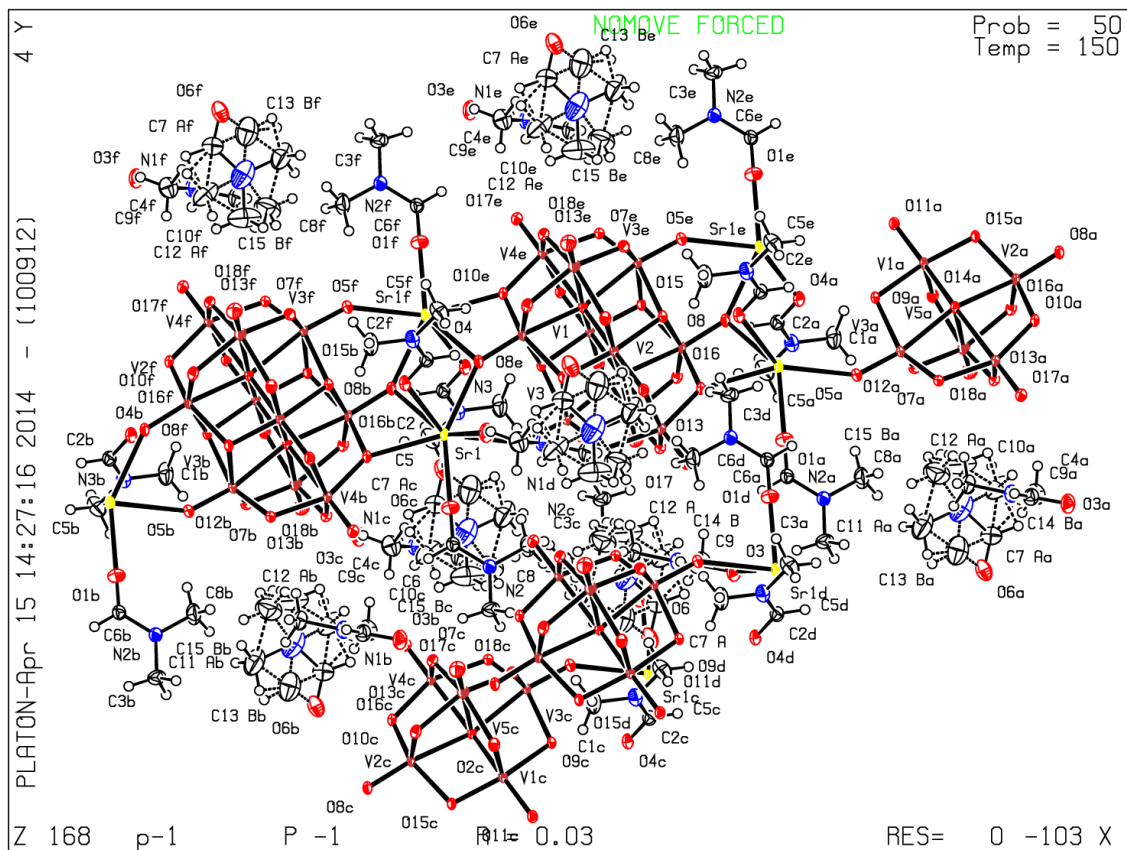

Supplement: c4dt03691c1.pdf [file c4dt03691c1.pdf]
